# Supplementary material for: Capsiate Intake with Exercise Training Additively Reduces Fat Deposition in Mice on a High-Fat Diet, but Not without Exercise Training
Source: MDPI journal article supplement (doi:10.3390/ijms22020769), 2021-01-14
Supplement: s1 [file s1]

| <b>Class</b>        | <b>Ingredient</b>                                  | <b>Mass /g</b> |
|---------------------|----------------------------------------------------|----------------|
| <b>Protein</b>      | <b>Casein, lactic, 30 mesh</b>                     | <b>200</b>     |
| <b>Protein</b>      | <b>Cystine, L</b>                                  | <b>3</b>       |
| <b>Carbohydrate</b> | <b>Lodex 10</b>                                    | <b>125</b>     |
| <b>Carbohydrate</b> | <b>Sucrose, fine granulated</b>                    | <b>72.8</b>    |
| <b>Fiber</b>        | <b>Sloka Flocc, FCC200</b>                         | <b>50</b>      |
| <b>Fat</b>          | <b>Lard</b>                                        | <b>245</b>     |
| <b>Fat</b>          | <b>Soybean Oil, USP</b>                            | <b>25</b>      |
| <b>Mineral</b>      | <b>S10026B</b>                                     | <b>50</b>      |
| <b>Vitamin</b>      | <b>Choline bitartrate</b>                          | <b>2</b>       |
| <b>Vitamin</b>      | <b>V10001C</b>                                     | <b>1</b>       |
| <b>Dye</b>          | <b>Dye, blue FD&amp;C #1, Alum. Lake 35 – 42 %</b> | <b>0.05</b>    |

**Table S1.** Formulation of the high-fat diet

|                       |                           |
|-----------------------|---------------------------|
| <b>Protein</b>        | <b>20 % of total kcal</b> |
| <b>Fat</b>            | <b>60 % of total kcal</b> |
| <b>Carbohydrate</b>   | <b>20 % of total kcal</b> |
| <b>Energy density</b> | <b>5.21 kcal/g</b>        |

**Table S2.** Calorific value of the high-fat diet
