# Supplementary material for: Capsiate Intake with Exercise Training Additively Reduces Fat Deposition in Mice on a High-Fat Diet, but Not without Exercise Training
Source: MDPI journal article supplement (doi:10.3390/ijms22020769), 2021-01-14
Supplement: s1 [file s1]

| <u>Primary antibody</u> |                        |               |           | <u>Secondary antibody</u> |               |           |
|-------------------------|------------------------|---------------|-----------|---------------------------|---------------|-----------|
| Target                  | Molecular Weight (kDa) | Concentration | Cat. No   | Target                    | Concentration | Cat. No   |
| UCP1                    | 32                     | 1:1000        | sc-6529   | anti-goat                 | 1:2000        | sc-2354   |
| MDH2                    | 35                     | 1:25000       | ab96193   | anti-rabbit               | 1:50000       | sc-2357   |
| CS                      | 52                     | 1:25000       | ab96600   |                           | 1:50000       |           |
| PGC1 $\alpha$           | 91                     | 1:2000        | ab54481   |                           | 1:4000        |           |
| GLUT4                   | 55                     | 1:3000        | ab654     |                           | 1:6000        |           |
| $\beta$ 2AR             | 46                     | 1:2000        | ab182136  |                           | 1:20000       |           |
| $\beta$ 3AR             | 43                     | 1:1000        | ab94506   |                           | 1:10000       |           |
| HXK2                    | 102                    | 1:4000        | sc-130358 | anti-mouse                | 1:8000        | sc-516102 |
| $\beta$ -actin          | 42                     | 1:1000        | sc-47778  |                           | 1:2000        |           |
| GAPDH                   | 36                     | 1:1000        | sc-35062  |                           | 1:2000        |           |

**Table S4.** Information of used antibodies in the study.
