# Supplementary material for: Capsiate Intake with Exercise Training Additively Reduces Fat Deposition in Mice on a High-Fat Diet, but Not without Exercise Training
Source: MDPI journal article supplement (doi:10.3390/ijms22020769), 2021-01-14
Supplement: s1 [file s1]

| Weekend          | 1 <sup>st</sup> | 2 <sup>nd</sup> | 3 <sup>rd</sup> | 4 <sup>th</sup> | 5 <sup>th</sup> | 6 <sup>th</sup> | 7 <sup>th</sup> | 8 <sup>th</sup> |
|------------------|-----------------|-----------------|-----------------|-----------------|-----------------|-----------------|-----------------|-----------------|
| Duration (min)   | 20              | 30              |                 | 40              |                 | 50              |                 | 60              |
| Velocity (m/min) | 13              |                 | 14              |                 | 15              |                 | 16              |                 |
| Slope (°)        | 8               |                 |                 |                 |                 |                 |                 |                 |

**Table S3.** Protocol of mild-intensity ET
